# Supplementary material for: Effect of a Fatty Acid Additive on the Kinetic Friction and Stiction of Confined Liquid Lubricants
Source: Springer Nature journal article supplement (doi:10.1007/s11249-016-0756-x), 2016-09-27
Supplement: MOESM1 [file 10759456]

Supplementary Material

**Effect of a Fatty Acid Additive on the Kinetic Friction and Stiction of Confined Liquid Lubricants**

Tribology Letters

*Shinji Yamada1,*,†, Kyeong A Inomata1, Eriko Kobayashi1, Tadao Tanabe1, and Kazue Kurihara2,3,**

1 New Industry Creation Hatchery Center, Tohoku University, 6-6-10 Aoba, Aramaki, Aoba-ku, Sendai, Miyagi 980-8579, Japan

2 Institute of Multidisciplinary Research for Advanced Materials, Tohoku University, 2-1-1 Katahira, Aoba-ku, Sendai, Miyagi 980-8577, Japan

3 Advanced Institute for Materials Research, Tohoku University, 2-1-1 Katahira, Aoba-ku, Sendai, Miyagi 980-8577, Japan

**Present Address**

*†* S.Y.: Analytical Science Research Laboratories, Kao Corporation, 1334 Minato, Wakayama, Wakayama 640-8580, Japan

**Corresponding Authors**

Shinji Yamada: [yamada.s@kao.co.jp](mailto:yamada.s@kao.co.jp)

Kazue Kurihara: [kurihara@tagen.tohoku.ac.jp](mailto:kurihara@tagen.tohoku.ac.jp)

**1. Liquid Structures of PAO at Different Pressure Ranges**

It is interesting to note that the stiction behavior of the 1.4 nm PAO film exhibited different trends below and above the pressure *P* of about 5 MPa (Figure 6a in the main text). When *P* was below 5 MPa, Δ*F* / *A* increased continuously with *t* and decreased slightly with the increase of *P*. On the other hand, when *P* was above 5 MPa, Δ*F* / *A* did not have a simple *t* dependence. The different stiction behaviors in the two *P* ranges imply different confined structures.

The time constant analysis shown in Figure 8 (in the main text) gives us the idea to discuss the point. For the 1.4 nm PAO film, *τ*1PAO increases with *P* and *τ*2PAO decreases with *P*; the two linear fittings on the semi-log scale intersect at the pressure of near 6 MPa (where *τ*1PAO = *τ*2PAO ≈ 3 s).

The molecular mechanism for *τ*2PAO is cooperative rearrangement involving neighboring molecules (as was discussed in the main text), which is governed by the length scale of cooperative structures in the confined film. Increasing applied pressure retards the molecular rearrangement in the system during aging, which means that the length scale of the cooperative structure at a given *t* decreases with *P*. This is the reason that *τ*2PAO decreases with increasing *P*. At the highest *P* condition (5.9 MPa), the spike force decay exhibits a single exponential function. This indicates that the 1.4 nm PAO film at the condition (*P* = 5.9 MPa and *t* = 1000 s) could be still a viscous liquid and not yet transit into a glass-like state. Stiction spike appears not only for solidified (glass-like) systems but also for viscous systems whose time scale of molecular motion is longer than the experimental time scale [[[1]](#endnote-1),[[2]](#endnote-2)]. The different stopping time dependence of the stiction spike height at the pressure below and above 5 MPa shown in Figure 6 could reflect the different confined structures in the system; glass-like structure at low *P* and viscous liquid state at high *P*. There is a debate whether we could distinguish the two possible liquid structures in confinement, solid-like (glass-like) state and extremely high-viscous liquid. The result obtained in this study could be one of the answers for this important question. Drummond and Israelachvili studied the stick-slip spike shape of confined lubricant liquids [[[3]](#endnote-3)]. They found that the force decay of the stick-slip spike was fitted by a double exponential function when sliding velocity was well below the critical velocity (*V*c) of stick-slip friction (above which stick-slip shifts to smooth sliding). On the other hand, the spike force decay was fitted by a single exponential function when sliding velocity was close to *V*c. This reported behavior in stick-slip friction and our observation in stiction should reflect the same physical phenomena in confined liquids.

**2. Macroscopic Friction Test Using Ball-On-Disc Tribometer**

In order to contrast the effect of palmitic acid (PA) additive in PAO on the friction properties for molecularly smooth surfaces (SFA) and macroscopic rough surfaces, friction measurements were carried out for the contact between rough steel/steel interface lubricated by PAO or PA/PAO using a ball-on-disk tribometer.

**Experimental**

The ball-on-disk tribometer used was a Bruker UMNT-1 with a rotary drive. The diameter of the steel ball (SUJ2) was 3 mm, and the surface roughness of the steel disk (SUJ2) was 5.9 ± 0.7 nm (*R*a). Drive rotation velocity was set to 20 rpm, which corresponds to the sliding velocity of 16.8 mm/s. Applied load was within the range of 1 - 5 N. Stop-start measurements were carried out and the stiction spike height Δ*F* (= *F*s − *F*k) was measured as a function of applied load and surface stopping time. The temperature was kept at 23 ± 1 °C and the relative humidity was fixed at 20 %.

**Results**

Typical example of the stop-start measurement for the steel ball/steel disk interface separated by two different lubricant systems is shown in Figure S1. The PAO lubricated system exhibited static friction (stiction spike) *F*s at the commencement of sliding. However, no stiction spike was observed for the contact interface lubricated by PA/PAO. In addition, kinetic friction *F*k of the PA/PAO lubricated system was smaller than that of the PAO lubricated system.

**Figure S1.** Typical friction traces obtained from the stop-start measurement of rough steel surfaces separated by PAO and PA/PAO lubricant. Experimental conditions: sliding velocity *V* = 16.8 mm/s, applied load *L* = 5 N, stopping time *t* = 300 s.

The stiction spike height Δ*F* was measured as a function of stopping time *t* at different applied load *L* conditions, the results are shown in Figure S2. The Δ*F* of PAO lubricated system increased slightly with the increase of *t*. Also, Δ*F* of the PAO lubricated system increased with *L*. On the other hand, no stiction spike was observed for the PA/PAO lubricated system in our experimental conditions.

**Figure S2.** Stiction spike height Δ*F* plotted as a function of stopping time *t* for the two lubricated systems under different applied load conditions.

Figure S3 shows the relationship between kinetic friction force and applied load. Approximately 30 % reduction in the friction coefficient *μ* was obtained by the PA additive.

**Figure S3.** Kinetic friction force as a function of applied load for the two lubricated systems (*V* = 16.8 mm/s). Friction coefficients obtained from the slope of the linear fit are included.

The results shown above indicate the advantage of PA additive for reducing stiction and kinetic friction for the rough steel/steel contact interface, which agrees to previous studies [[[4]](#endnote-4)-[[5]](#endnote-5)[[6]](#endnote-6)[[7]](#endnote-7)].

**3. References**

1. [] Israelachvili, J.N.: Intermolecular and Surface Forces, 3rd Ed. Academic Press, Amsterdam, Netherlands (2011) [↑](#endnote-ref-1)
2. [] Israelachvili, J., Berman, A.D.: Surface Forces and Microrheology of molecularly thin liquid films. In: Bhushan, B. (ed.) CRC Handbook of Micro/Nanotribology, 2nd Ed., pp. 371-432. CRC Press, Boca Raton, FL, USA (1999) [↑](#endnote-ref-2)
3. [] Drummond, C., Israelachvili, J.: Dynamic Phase Transitions in Confined Lubricant Fluids under Shear. Phys. Rev. E 63, 041506 (2001) [↑](#endnote-ref-3)
4. [] Spikes, H.; Friction Modifier Additives. Tribol. Lett. 60, 5 (2015) [↑](#endnote-ref-4)
5. [] Rounds, F.G.: Effect of Lubricant Composition on Friction as Measured with Thrust Ball Bearings. J. Chem. Eng. Data 5, 499-507 (1960) [↑](#endnote-ref-5)
6. [] Smith, O., Priest, M., Taylor, R.I., Price, R., Cantlay, A., Coy, R.C.: Simulated Fuel Dilution and Friction-Modifier Effects on Piston Ring Friction. Proc. Inst. Mech. Eng. J J. Eng. Tribol. 220, 181-189 (2006) [↑](#endnote-ref-6)
7. [] Loehle, S., Matta, C., Minfray, C., Le Mogne, T., Martin, J.-M., Iovine, R., Obara, Y., Miura, R., Miyamoto, A.: Mixed Lubrication with C18 Fatty Acids: Effect of Unsaturation. Tribol. Lett. 53, 319-328 (2014) [↑](#endnote-ref-7)
